# Supplementary material for: Annotation of Human Exome Gene Variants with Consensus Pathogenicity
Source: Preprints.org preprint supplement (doi:10.20944/preprints202007.0735.v1), 2020-07-31
Supplement: Supplementary file 1 [file supplementary]

# Supplemental information

## Table S1. List of the impact effect scores

The table contains dbNSFP IDs, score names and sources of the functional/conservation scores from dbNSFP4.0 (Liu X, Wu C, Li C and Boerwinkle E. 2016. dbNSFP v3.0: A One-Stop Database of Functional Predictions and Annotations for Human Non-synonymous and Splice Site SNVs. *Human Mutation.* 37(3):235-241.).

| dbnsfp-ID | Score name | Source |
| --- | --- | --- |
| 38 | SIFT_converted_rankscore | SIFT ensembl 66, released Jan, 2015 http://provean.jcvi.org/index.php |
| 41 | SIFT4G_converted_rankscore | SIFT4G 2.4, released Nov. 1, 2016 http://sift.bii.a-star.edu.sg/sift4g/public//Homo_sapiens/ |
| 44 | Polyphen2_HDIV_rankscore | Polyphen-2 v2.2.2, released Feb, 2012 http://genetics.bwh.harvard.edu/pph2/ |
| 47 | Polyphen2_HVAR_rankscore | Polyphen-2 v2.2.2, released Feb, 2012 http://genetics.bwh.harvard.edu/pph2/ |
| 50 | LRT_converted_rankscore | LRT, released November, 2009 http://www.genetics.wustl.edu/jflab/lrt_query.html |
| 54 | MutationTaster_converted_rankscore | MutationTaster 2, data retrieved in 2015 http://www.mutationtaster.org/ |
| 59 | MutationAssessor_rankscore | MutationAssessor release 3, http://mutationassessor.org/ |
| 62 | FATHMM_converted_rankscore | FATHMM v2.3, http://fathmm.biocompute.org.uk |
| 65 | PROVEAN_converted_rankscore | PROVEAN 1.1 ensembl 66, released Jan, 2015 http://provean.jcvi.org/index.php |
| 68 | VEST4_rankscore | VEST v4.0, http://karchinlab.org/apps/appVest.html |
| 70 | MetaSVM_rankscore | MetaSVM and MetaLR, doi: 10.1093/hmg/ddu733 |
| 73 | MetaLR_rankscore | MetaSVM and MetaLR, doi: 10.1093/hmg/ddu733 |
| 77 | M-CAP_rankscore | M-CAP v1.3, http://bejerano.stanford.edu/MCAP/ |
| 80 | REVEL_rankscore | REVEL, https://sites.google.com/site/revelgenomics/ |
| 82 | MutPred_rankscore | MutPred v1.2, http://mutpred.mutdb.org/ |
| 87 | MVP_rankscore | MVP 1.0, https://github.com/ShenLab/missense |
| 89 | MPC_rankscore | MPC release1, ftp://ftp.broadinstitute.org/pub/ExAC_release/release1/regional_missense_constraint/ |
| 91 | PrimateAI_rankscore | PrimateAI, https://github.com/Illumina/PrimateAI |
| 94 | DEOGEN2_rankscore | deogen2, https://deogen2.mutaframe.com/ |
| 103 | CADD_raw_rankscore | CADD v1.4, http://cadd.gs.washington.edu/ |
| 106 | DANN_rankscore | DANN, https://cbcl.ics.uci.edu/public_data/DANN/ |
| 108 | fathmm-MKL_coding_rankscore | fathmm-MKL, http://fathmm.biocompute.org.uk/fathmmMKL.htm |
| 112 | fathmm-XF_coding_rankscore | fathmm-XF, http://fathmm.biocompute.org.uk/fathmm-xf/ |
| 115 | Eigen-raw_coding_rankscore | Eigen & Eigen PC v1.1, http://www.columbia.edu/~ii2135/eigen.html |
| 118 | Eigen-PC-raw_coding_rankscore | Eigen & Eigen PC v1.1, http://www.columbia.edu/~ii2135/eigen.html |
| 121 | GenoCanyon_score_rankscore | GenoCanyon v1.0.3, http://genocanyon.med.yale.edu/index.html |
| 123 | integrated_fitCons_rankscore | fitCons v1.01, http://compgen.bscb.cornell.edu/fitCons/ |
| 126 | GM12878_fitCons_rankscore | fitCons v1.01, http://compgen.bscb.cornell.edu/fitCons/ |
| 129 | H1-hESC_fitCons_rankscore | fitCons v1.01, http://compgen.bscb.cornell.edu/fitCons/ |
| 132 | HUVEC_fitCons_rankscore | fitCons v1.01, http://compgen.bscb.cornell.edu/fitCons/ |
| 135 | LINSIGHT_rankscore | LINSIGHT, http://compgen.cshl.edu/~yihuang/LINSIGHT/ |
| 138 | GERP++_RS_rankscore | GERP++ http://mendel.stanford.edu/SidowLab/downloads/gerp/ |
| 140 | phyloP100way_vertebrate_rankscore | phyloP100way_vertebrate (hg38) http://hgdownload.soe.ucsc.edu/goldenPath/hg38/phyloP100way/ |
| 142 | phyloP30way_mammalian_rankscore | phyloP30way_mammalian (hg38) http://hgdownload.soe.ucsc.edu/goldenPath/hg38/phyloP30way/ |
| 144 | phyloP17way_primate_rankscore | phyloP17way_primate (hg38) http://hgdownload.soe.ucsc.edu/goldenPath/hg38/phyloP17way/ |
| 146 | phastCons100way_vertebrate_rankscore | phastCons100way_vertebrate (hg38) http://hgdownload.soe.ucsc.edu/goldenPath/hg38/phastCons100way/ |
| 148 | phastCons30way_mammalian_rankscore | phastCons30way_mammalian (hg38) http://hgdownload.soe.ucsc.edu/goldenPath/hg38/phastCons30way/ |
| 150 | phastCons17way_primate_rankscore | phastCons17way_primate (hg38) http://hgdownload.soe.ucsc.edu/goldenPath/hg38/phastCons17way/ |
| 153 | SiPhy_29way_logOdds_rankscore | SiPhy https://www.broadinstitute.org/mammals-models/29-mammals-project-supplementary-info |
| 155 | bStatistic_rankscore | bStatistic http://cadd.gs.washington.edu/ |
| 227 | gnomAD_exomes_AC | Alternative allele count in the whole gnomAD exome samples (125,748 samples) |
| 261 | gnomAD_exomes_POPMAX_AF | Maximum allele frequency across populations (excluding samples of Ashkenazi, Finnish, and indeterminate ancestry) |
| 263 | gnomAD_exomes_controls_AC | Alternative allele count in the controls subset of whole gnomAD exome samples (54,704 samples) |
| 297 | gnomAD_exomes_controls_POPMAX_AF | Maximum allele frequency across populations (excluding samples of Ashkenazi, Finnish, and indeterminate ancestry) in the controls subset |
| 463 | Gene_indispensability_score | A probability prediction of the gene being essential. From doi:10.1371/journal.pcbi.1002886 |

## Table S2. The individual parameters of the base learners

(a) GLM: *function = h2o.glm, distribution = "multinomial", compute_p_values=FALSE, link="family_default", lambda=2e-6, solver="AUTO", balance_classes = TRUE, max_after_balance_size = 1.5, nfolds=5, fold_assignment="Modulo", keep_cross_validation_predictions = TRUE*.

(b) GBM: *function = h2o.gbm, ntrees = 30, max_depth = 6, learn_rate = 0.9, min_rows = 64, distribution="multinomial", balance_classes = TRUE, max_after_balance_size = 1.5, nfolds = 5, fold_assignment = "Modulo", keep_cross_validation_predictions = TRUE,.*

(c) DRF: *function = h2o.randomForest, ntrees = 130, max_depth = 20, sample_rate = 0.9, mtries = -1, min_rows = 5, balance_classes = TRUE, max_after_balance_size = 1.5,nfolds = 5, fold_assignment = "Modulo", keep_cross_validation_predictions = TRUE.*

(d) Ensemble: *function = h2o.stackedEnsemble, base_models=list(drf, gbm, glm), metalearner_nfolds=5, metalearner_fold_assignment="Modulo", metalearner_algorithm = "GLM").*

All other parameters were set to default values.

### Table S3a. Model fitting output for the base-learner “GLM”

Model Details:

H2OMultinomialModel: glm

GLM Model: summary

Family= multinomial link= multinomial regularization= Elastic Net (alpha = 0.5, lambda = 3.0E-6 )

Cross-Validation Set Metrics:

MSE: 0.388

RMSE: 0.623

Logloss: 1.06

Mean Per-Class Error: 0.535

R^2: 0.842

Top-5 Hit RatioTable:

k hit_ratio

1 1 0.545718

2 2 0.825097

3 3 0.937018

4 4 0.976519

5 5 1.000000

Cross-Validation Metrics Summary:

mean sd cv_1_valid cv_2_valid cv_3_valid cv_4_valid cv_5_valid

accuracy 0.54080003 0.0022095032 0.541804 0.5437157 0.5408064 0.54281193 0.53486186

err 0.4592 0.0022095032 0.45819598 0.45628425 0.45919356 0.45718804 0.46513814

err_count 12261.8 56.784504 12232.0 12238.0 12322.0 12142.0 12375.0

logloss 1.0697118 0.0029180122 1.0699316 1.0686098 1.068005 1.0647764 1.077236

max_per_class_error 0.84432226 0.004410384 0.8384401 0.84464926 0.83900857 0.84373564 0.8557778

mean_per_class_accuracy 0.45626974 0.0016800825 0.45730522 0.45903042 0.45642695 0.45671114 0.451875

mean_per_class_error 0.54373026 0.0016800825 0.5426948 0.54096955 0.543573 0.5432889 0.54812497

mse 0.3948089 9.211634E-4 0.39526433 0.39438918 0.39470974 0.39282942 0.39685184

null_deviance 83932.414 252.94965 83970.7 84308.92 84314.74 83405.945 83661.74

r2 0.8397035 5.888411E-4 0.8390949 0.83982146 0.83998936 0.84102666 0.83858526

residual_deviance 57128.45 209.03355 57125.79 57322.367 57317.688 56556.664 57319.727

rmse 0.6283373 7.32975E-4 0.6287005 0.62800413 0.6282593 0.626761 0.6299618

Test Set Metrics:

MSE: 0.388

RMSE: 0.623

Logloss: 1.06

Mean Per-Class Error: 0.535

R^2: 0.842

Confusion Matrix:

-2 -1 0 1 2 Error Rate

-2 29355 3566 1349 333 1095 0.1777 = 6,343 / 35,698

-1 15212 4326 1195 213 564 0.7989 = 17,184 / 21,510

0 5544 1150 5434 2572 4016 0.7097 = 13,282 / 18,716

1 2684 482 3016 3500 12249 0.8404 = 18,431 / 21,931

2 1868 258 1450 1837 30246 0.1518 = 5,413 / 35,659

Totals 54663 9782 12444 8455 48170 0.4543 = 60,653 / 133,514

Row labels: Actual class; Column labels: Predicted class

### Table S3b. GLM – sorted by pseudo-R2-measure from training using individual features

"10" 0.818

"20" 0.811

"24" 0.811

"31" 0.808

" 6" 0.806

"25" 0.805

"15" 0.799

"14" 0.798

"13" 0.798

"12" 0.797

"19" 0.793

"16" 0.793

"18" 0.792

" 4" 0.791

"22" 0.790

"11" 0.789

"17" 0.787

" 9" 0.787

" 3" 0.786

" 7" 0.786

" 1" 0.785

"33" 0.784

" 2" 0.781

" 5" 0.781

"39" 0.781

"36" 0.780

"21" 0.779

"23" 0.779

"32" 0.775

" 8" 0.771

"37" 0.770

"34" 0.768

"38" 0.767

"26" 0.765

"41" 0.763

"35" 0.762

"27" 0.751

"29" 0.750

"40" 0.750

"30" 0.750

"28" 0.750

### Table S3c. Model fitting output for the base-learner “GBM”

Model Details:

H2OMultinomialModel: gbm

Model Summary:

number_of_trees number_of_internal_trees model_size_in_bytes min_depth

1 30 150 116246 7

max_depth mean_depth min_leaves max_leaves mean_leaves

1 7 7.00000 22 97 57.08000

Training Set Metrics:

MSE: 0.2316003

RMSE: 0.4812487

Logloss: 0.6917729

Mean Per-Class Error: 0.2778084

Confusion Matrix: Row labels: Actual class; Column labels: Predicted class

-2 -1 0 1 2 Error Rate

-2 29419 3898 1217 754 410 0.1759 = 6,279 / 35,698

-1 11205 21386 1764 938 372 0.4004 = 14,279 / 35,665

0 3286 1861 24325 4355 1885 0.3189 = 11,387 / 35,712

1 1332 600 3617 22671 7454 0.3645 = 13,003 / 35,674

2 472 143 952 3053 31074 0.1294 = 4,620 / 35,694

Totals 45714 27888 31875 31771 41195 0.2778 = 49,568 / 178,443

Hit Ratio Table:

Top-5 Hit Ratios:

k hit_ratio

1 1 0.722219

2 2 0.921706

3 3 0.974283

4 4 0.991667

5 5 1.000000

Cross-Validation Set Metrics:

MSE: 0.3138585

RMSE: 0.5602308

Logloss: 0.9818054

Mean Per-Class Error: 0.4377324

Top-5 Hit Ratios:

k hit_ratio

1 1 0.606401

2 2 0.869939

3 3 0.955038

4 4 0.983740

5 5 1.000000

Cross-Validation Metrics Summary:

mean sd cv_1_valid cv_2_valid cv_3_valid cv_4_valid cv_5_valid

accuracy 0.6063998 9.945707E-4 0.60585856 0.60840386 0.605575 0.6076135 0.60454804

err 0.3936002 9.945707E-4 0.39414144 0.39159614 0.39442497 0.39238647 0.395452

err_count 10510.2 37.0281 10522.0 10503.0 10584.0 10421.0 10521.0

logloss 0.9817988 0.004505569 0.9781501 0.9850682 0.9820777 0.97239083 0.9913073

max_per_class_error 0.6004519 0.0018044758 0.6049496 0.59750646 0.59886366 0.59971714 0.6012227

mean_per_class_accuracy 0.5622839 8.974609E-4 0.56135696 0.56460136 0.56224 0.5622871 0.5609339

mean_per_class_error 0.43771613 8.974609E-4 0.43864304 0.43539864 0.43776 0.43771288 0.43906608

mse 0.31385753 0.0010074427 0.31441486 0.31337523 0.3141749 0.3114901 0.31583253

r2 0.87257034 5.740594E-4 0.87200725 0.8727247 0.8726372 0.8739437 0.8715389

rmse 0.56022847 8.9952536E-4 0.5607271 0.5597993 0.5605131 0.558113 0.5619898

Test Set Metrics:

MSE: 0.2147934

RMSE: 0.4634581

Logloss: 0.6485677

Mean Per-Class Error: 0.2849858

Confusion Matrix: Row labels: Actual class; Column labels: Predicted class

-2 -1 0 1 2 Error Rate

-2 29419 3898 1217 754 410 0.1759 = 6,279 / 35,698

-1 7008 12592 1110 572 228 0.4146 = 8,918 / 21,510

0 1727 986 12668 2340 995 0.3231 = 6,048 / 18,716

1 838 374 2364 13558 4797 0.3818 = 8,373 / 21,931

2 472 142 951 3053 31041 0.1295 = 4,618 / 35,659

Totals 39464 17992 18310 20277 37471 0.2564 = 34,236 / 133,514

Hit Ratio Table:

Top-5 Hit Ratios:

k hit_ratio

1 1 0.743578

2 2 0.927064

3 3 0.974482

4 4 0.991566

5 5 1.000000

### Table S3d Model fitting output for the base-learner “DRF”

Model Summary:

number_of_trees number_of_internal_trees model_size_in_bytes min_depth

1 100 500 68228728 21

max_depth mean_depth min_leaves max_leaves mean_leaves

1 21 21.00000 8039 13077 10881.03400

Training Set Metrics:

MSE: 0.245335

RMSE: ( 0.4953131

Logloss: 0.7839877

Mean Per-Class Error: 0.2541096

Confusion Matrix: Row labels: Actual class; Column labels: Predicted class

-2 -1 0 1 2 Error Rate

-2 30059 3405 1080 552 601 0.1579 = 5,638 / 35,697

-1 12753 21442 706 389 374 0.3988 = 14,222 / 35,664

0 3403 533 28036 1441 2298 0.2149 = 7,675 / 35,711

1 1213 197 1490 22560 10213 0.3676 = 13,113 / 35,673

2 637 122 825 3103 31004 0.1313 = 4,687 / 35,691

Totals 48065 25699 32137 28045 44490 0.2541 = 45,335 / 178,436

Hit Ratio Table:

Top-5 Hit Ratios:

k hit_ratio

1 1 0.745931

2 2 0.947455

3 3 0.981641

4 4 0.992171

5 5 1.000000

** 5-fold cross-validation on training data **

Cross-Validation Set Metrics:

MSE: 0.3121071

RMSE: 0.5586655

Logloss: 0.8790636

Mean Per-Class Error: 0.4533674

Top-5 Hit Ratios:

k hit_ratio

1 1 0.618946

2 2 0.883757

3 3 0.962723

4 4 0.986324

5 5 1.000000

Cross-Validation Metrics Summary:

mean sd cv_1_valid cv_2_valid cv_3_valid cv_4_valid cv_5_valid

accuracy 0.61894226 0.0017818131 0.6192688 0.62260914 0.6179474 0.6199638 0.614922

err 0.38105777 0.0017818131 0.3807312 0.37739086 0.38205263 0.38003615 0.38507798

err_count 10175.2 45.257927 10164.0 10122.0 10252.0 10093.0 10245.0

logloss 0.87906915 0.002845447 0.8802153 0.87902075 0.8746687 0.87548447 0.8859566

max_per_class_error 0.7423255 0.004905025 0.7477085 0.7426488 0.72886366 0.7458746 0.74653184

mean_per_class_accuracy 0.54661924 0.0016683937 0.5476766 0.55073774 0.54520774 0.5453188 0.5441552

mean_per_class_error 0.4533808 0.0016683937 0.45232338 0.44926223 0.45479223 0.4546812 0.45584485

mse 0.31210867 8.8877673E-4 0.31267777 0.31123692 0.31152028 0.3108118 0.31429666

r2 0.8732805 5.2272924E-4 0.8727144 0.8735932 0.8737134 0.8742182 0.8721636

rmse 0.55866575 7.94834E-4 0.55917597 0.5578861 0.55814 0.55750495 0.5606217

Test Set Metrics:

MSE: 0.1151542

RMSE: 0.3393438

Logloss: 0.3868228

Mean Per-Class Error: 0.07395107

Confusion Matrix:

Confusion Matrix: Row labels: Actual class; Column labels: Predicted class

-2 -1 0 1 2 Error Rate

-2 35337 159 6 56 140 0.0101 = 361 / 35,698

-1 3309 18031 28 70 72 0.1617 = 3,479 / 21,510

0 403 32 17962 33 286 0.0403 = 754 / 18,716

1 298 23 37 18700 2873 0.1473 = 3,231 / 21,931

2 200 29 8 130 35292 0.0103 = 367 / 35,659

Totals 39547 18274 18041 18989 38663 0.0614 = 8,192 / 133,514

Hit Ratio Table:

Top-5 Hit Ratios:

k hit_ratio

1 1 0.938643

2 2 0.997004

3 3 0.999970

4 4 1.000000

5 5 1.000000

## Table S3e. Model fitting output for the meta-learner “Ensemble”

H2OMultinomialModel: stackedensemble

Number of Base Models: 3

Base Models (count by algorithm type): drf gbm glm

Metalearner algorithm: glm

Metalearner cross-validation fold assignment:

Fold assignment scheme: Modulo

Number of folds: 5

Training Set Metrics:

MSE: 0.1039267

RMSE: 0.3223766

Logloss: 0.3606753

Mean Per-Class Error: 0.08435653

Confusion Matrix: Row labels: Actual class; Column labels: Predicted class

-2 -1 0 1 2 Error Rate

-2 34764 442 173 181 138 0.0262 = 934 / 35,698

-1 2110 18990 244 91 75 0.1172 = 2,520 / 21,510

0 239 77 18208 158 34 0.0271 = 508 / 18,716

1 454 59 241 17137 4040 0.2186 = 4,794 / 21,931

2 264 45 125 733 34492 0.0327 = 1,167 / 35,659

Totals 37831 19613 18991 18300 38779 0.0743 = 9,923 / 133,514

Hit Ratio Table:

Top-5 Hit Ratios:

k hit_ratio

1 1 0.925678

2 2 0.987949

3 3 0.995536

4 4 0.999049

5 5 1.000000

Validation Set Metrics:

MSE: 0.1039267

RMSE: 0.3223766

Logloss: 0.3606753

Mean Per-Class Error: 0.08435653

Confusion Matrix: Row labels: Actual class; Column labels: Predicted class

-2 -1 0 1 2 Error Rate

-2 34764 442 173 181 138 0.0262 = 934 / 35,698

-1 2110 18990 244 91 75 0.1172 = 2,520 / 21,510

0 239 77 18208 158 34 0.0271 = 508 / 18,716

1 454 59 241 17137 4040 0.2186 = 4,794 / 21,931

2 264 45 125 733 34492 0.0327 = 1,167 / 35,659

Totals 37831 19613 18991 18300 38779 0.0743 = 9,923 / 133,514

Hit Ratio Table:

Top-5 Hit Ratios:

k hit_ratio

1 1 0.925678

2 2 0.987949

3 3 0.995536

4 4 0.999049

5 5 1.000000

Cross-Validation Set Metrics:

MSE: 0.2905095

RMSE: 0.5389893

Logloss: ( 0.8525439

Mean Per-Class Error: 0.4090067

Top-5 Hit Ratios:

k hit_ratio

1 1 0.640030

2 2 0.893577

3 3 0.963120

4 4 0.986556

5 5 1.000000

Test Set Metrics:

MSE: 0.1039267

RMSE: 0.3223766

Logloss: 0.3606753

Mean Per-Class Error: 0.08435653

Confusion Matrix: Row labels: Actual class; Column labels: Predicted class

-2 -1 0 1 2 Error Rate

-2 34764 442 173 181 138 0.0262 = 934 / 35,698

-1 2110 18990 244 91 75 0.1172 = 2,520 / 21,510

0 239 77 18208 158 34 0.0271 = 508 / 18,716

1 454 59 241 17137 4040 0.2186 = 4,794 / 21,931

2 264 45 125 733 34492 0.0327 = 1,167 / 35,659

Totals 37831 19613 18991 18300 38779 0.0743 = 9,923 / 133,514

Hit Ratio Table:

Top-5 Hit Ratios:

k hit_ratio

1 1 0.925678

2 2 0.987949

3 3 0.995536

4 4 0.999049

5 5 1.000000
